# Supplementary material
Source: PubMed Central journal article supplement (PMC1129117)

# Endogenous AML1 in 32D Cells

Immunoblot

Days

0 3 6 12

AML1

Lamin B

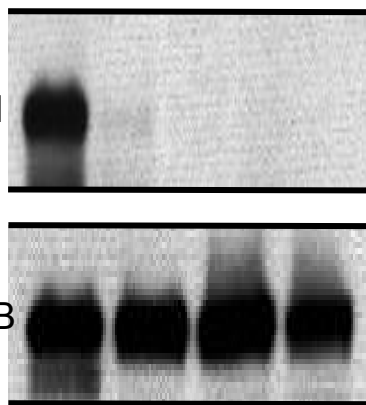

Q-PCR

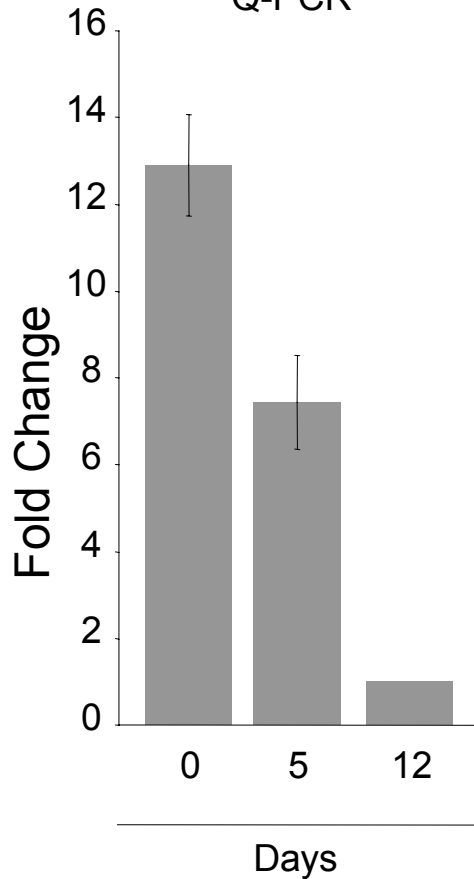

Supplement: pnas_0502130102_1.pdf [file pnas_0502130102_1.pdf]
