# Supplementary material
Source: PubMed Central journal article supplement (PMC1129117)

## Signaling

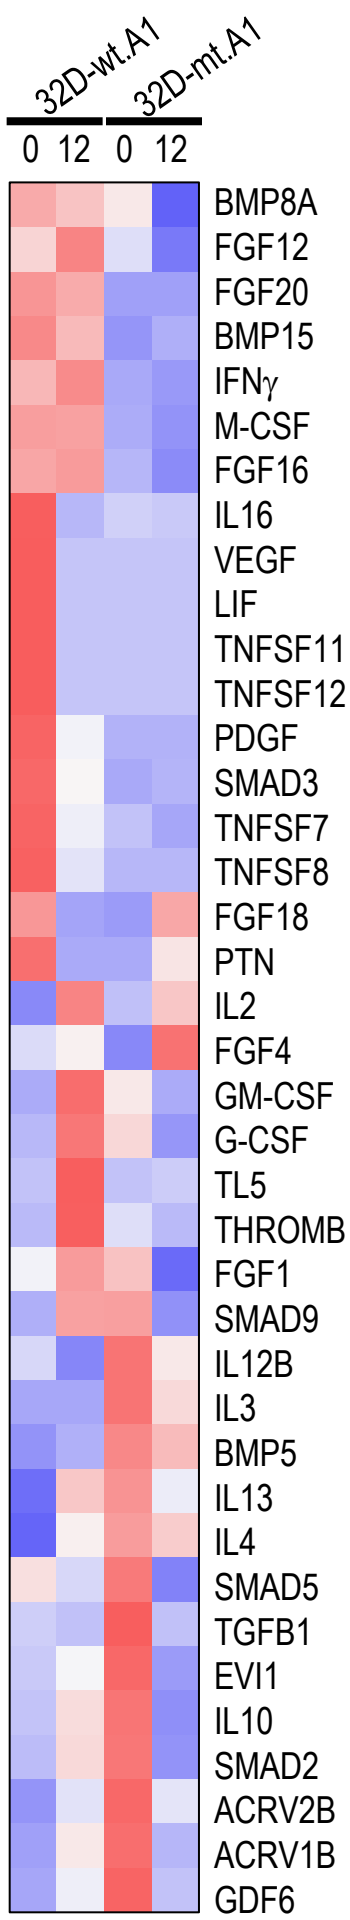

## Cell Cycle

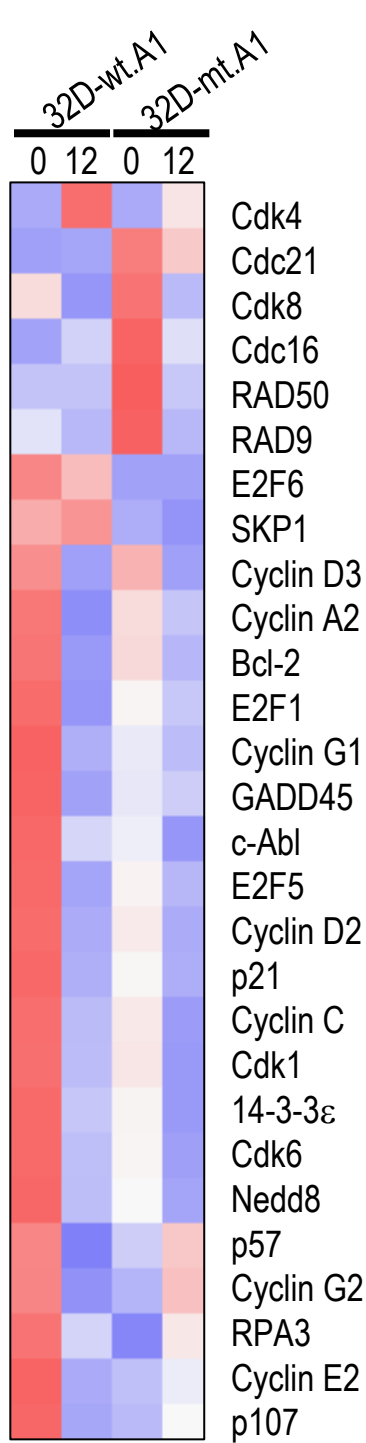

## Apoptosis

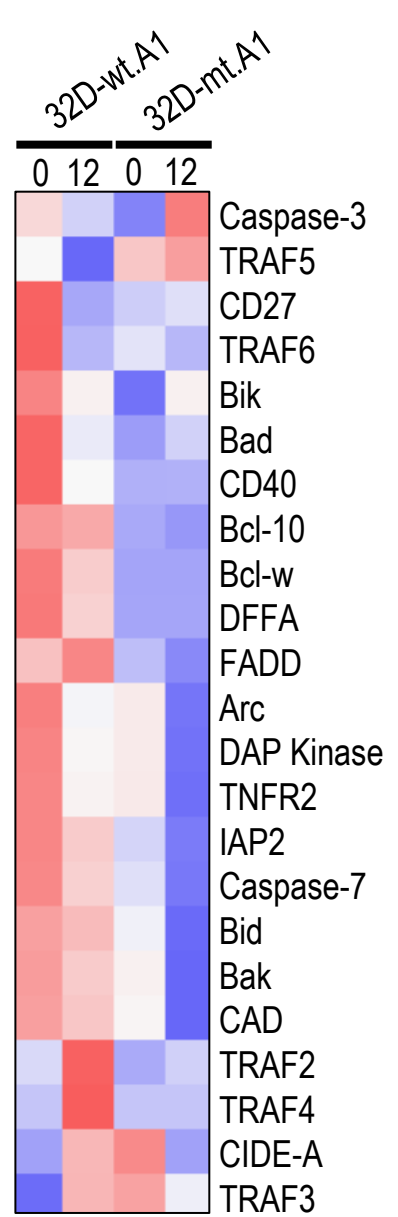

Supplement: pnas_0502130102_2.pdf [file pnas_0502130102_2.pdf]
