# Supplementary material
Source: PubMed Central journal article supplement (PMC1129117)

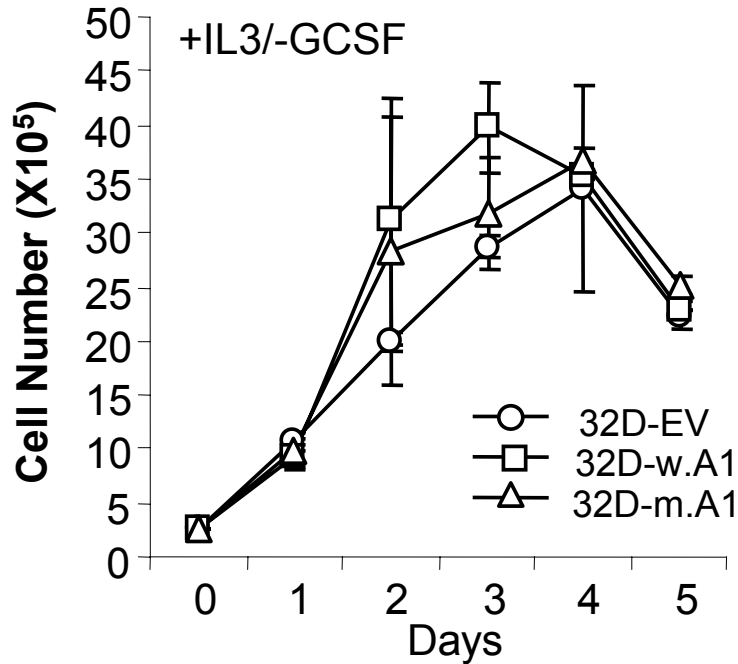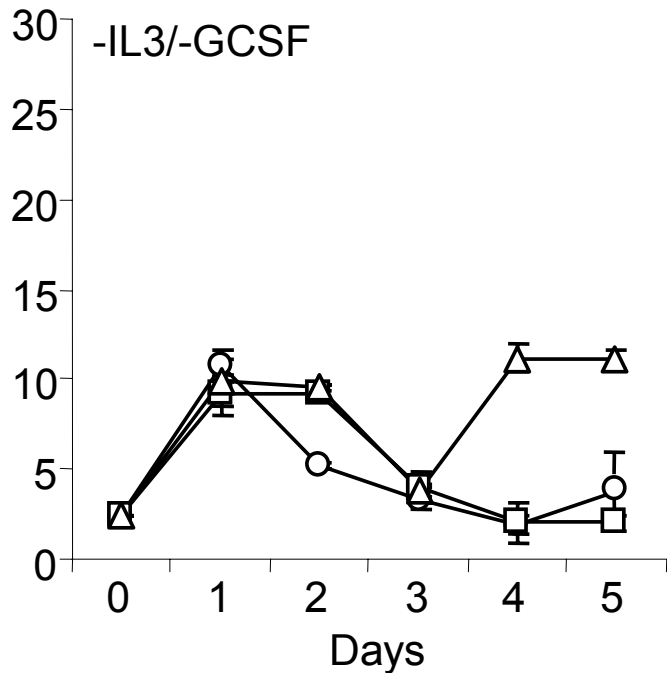

Supplement: pnas_0502130102_3.pdf [file pnas_0502130102_3.pdf]
